# Supplementary material
Source: PubMed Central journal article supplement (PMC2796584)
Supplement: NIHMS138439-supplement-Supplementary_Materials.pdf [file NIHMS138439-supplement-Supplementary_Materials.pdf]

# Lognormal Model

The error  $u_i \sim N(0, 1)$ .

## Simulations:

The error for the censoring times  $w_i \sim \text{Gamma}(a_C, s_C)$  with  $a_C = 3$ , and  $s_C$  chosen such that the censoring rate is  $1/3$ .

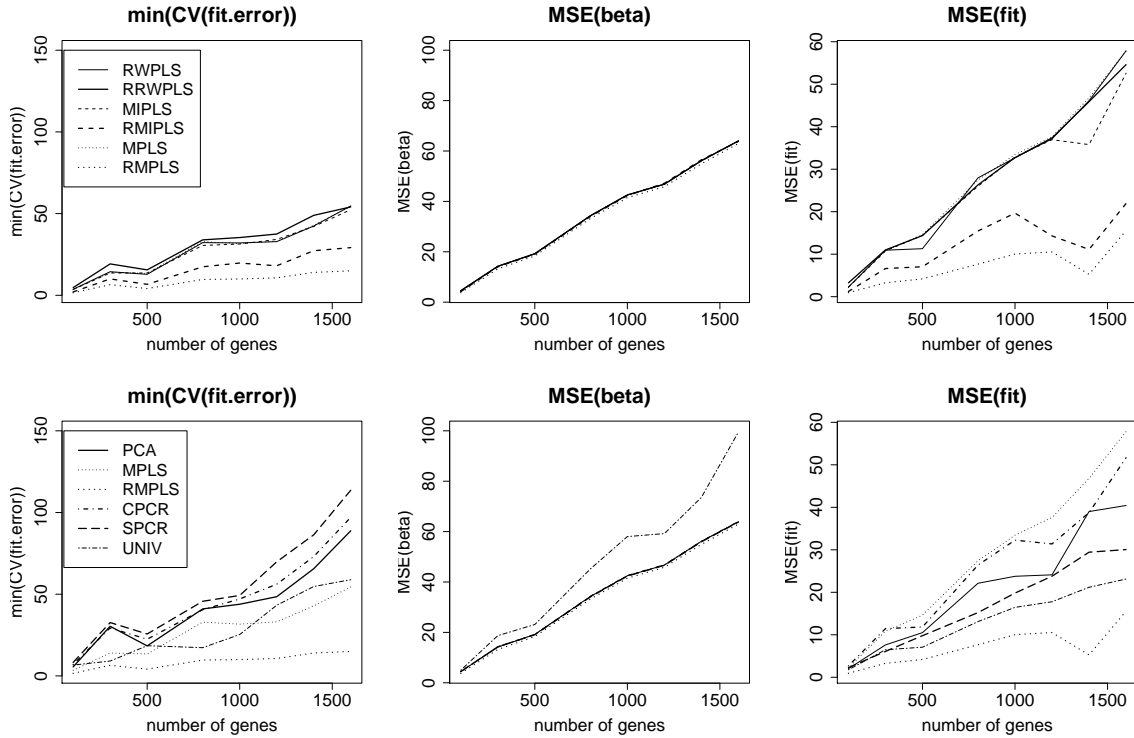

Figure 4: AFT lognormal model:  $1/3$  censored.  $K$  is chosen by CV.  $\min(CV(\text{fit.error}))$ ,  $MSE(\beta)$ , and  $MSE(\text{fit})$  comparing RWPLS, RRWPLS, MIPLS, RMIPLS, MPLS, and RMPLS (top row), and comparing PCA, MPLS, RMPLS, SPCR, CPCR, and UNIV (bottom row) based on 5000 simulations.

## Real Datasets:

Table 4: AFT lognormal model: DLBCL, Harvard, Michigan and Duke datasets.  $K$  chosen by  $CV$  for the different methods. The  $\min(CV(\text{fit.error}))$  and the standard error of the 1000 repeated runs are shown.

| Method | DLBCL |        |        | HARVARD |        |        | MICHIGAN |        |        | DUKE |         |        |
|--------|-------|--------|--------|---------|--------|--------|----------|--------|--------|------|---------|--------|
|        | K     | error  | SE     | K       | error  | SE     | K        | error  | SE     | K    | error   | SE     |
| PCA    | 5     | 4.2777 | 0.613  | 8       | 1.6818 | 0.4334 | 5        | 3.0234 | 0.571  | 3    | 7.5555  | 6.5953 |
| MPLS   | 3     | 2.6898 | 0.3677 | 1       | 0.7674 | 0.1716 | 2        | 1.4869 | 0.5369 | 1    | 11.5719 | 7.6254 |
| RMPLS  | 3     | 2.3094 | 0.3147 | 1       | 0.7197 | 0.1666 | 3        | 1.3134 | 0.4866 | 2    | 3.7767  | 2.7053 |
| RWPLS  | 1     | 4.497  | 0.6638 | 1       | 1.4075 | 0.2928 | 1        | 3.7289 | 0.7274 | 1    | 5.7954  | 1.5946 |
| RRWPLS | 1     | 4.6724 | 0.6426 | 1       | 2.0568 | 0.4293 | 1        | 3.5236 | 1.1506 | 1    | 6.4081  | 2.5808 |
| MIPLS  | 3     | 3.2752 | 0.3726 | 1       | 0.8397 | 0.1754 | 1        | 2.7344 | 1.2199 | 2    | 6.7075  | 4.358  |
| RMIPLS | 3     | 2.4295 | 0.3678 | 1       | 0.8782 | 0.2745 | 1        | 1.4655 | 0.4865 | 1    | 7.3502  | 4.3976 |
| CPCR   | 1     | 4.9405 | 1.0879 | 1       | 2.0698 | 0.5926 | 1        | 4.5654 | 2.0616 | 4    | 9.8469  | 8.3316 |
| SPCR   | 1     | 4.683  | 0.934  | 2       | 2.9574 | 1.344  | 2        | 4.7596 | 2.1524 | 3    | 15.83   | 6.4653 |
| UNIV   | 11    | 4.8362 | 1.0441 | 9       | 2.4435 | 1.1892 | 6        | 4.6573 | 2.0643 | 4    | 15.1069 | 8.9731 |

## Log-t Model

The error  $u_i \sim t(3)$ .

### Simulations:

The error for the censoring times  $w_i \sim \text{Gamma}(a_C, s_C)$  with  $a_C = 3$ , and  $s_C$  chosen such that the censoring rate is  $1/3$ .

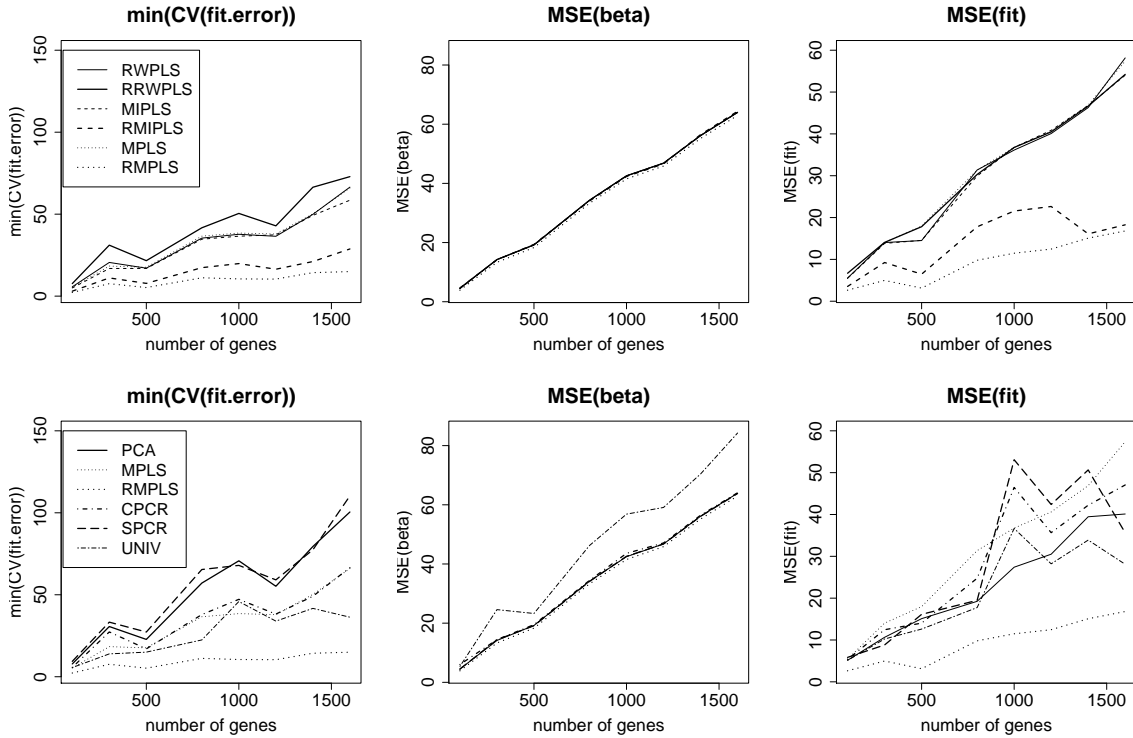

Figure 5: AFT logt model:  $1/3$  censored.  $K$  is chosen by CV.  $\min(CV(\text{fit.error}))$ ,  $MSE(\beta)$ , and  $MSE(\text{fit})$  comparing RWPLS, RRWPLS, MIPLS, RMIPLS, MPLS, and RMPLS (top row), and comparing PCA, MPLS, RMPLS, SPCR, CPCR, and UNIV (bottom row) based on 5000 simulations.

## Real Datasets:

Table 5: AFT log-t model: DLBCL, Harvard, Michigan and Duke datasets.  $K$  chosen by CV for the different methods. The  $\min(CV(\text{fit.error}))$  and the standard error of the 1000 repeated runs are shown.

| Method | DLBCL |        |        | HARVARD |        |        | MICHIGAN |        |        | DUKE |         |        |
|--------|-------|--------|--------|---------|--------|--------|----------|--------|--------|------|---------|--------|
|        | K     | error  | SE     | K       | error  | SE     | K        | error  | SE     | K    | error   | SE     |
| PCA    | 4     | 5.4655 | 0.772  | 7       | 1.7788 | 0.4683 | 6        | 4.8945 | 0.6511 | 5    | 24.3901 | 7.0841 |
| MPLS   | 3     | 2.7872 | 0.53   | 3       | 0.5571 | 0.2004 | 3        | 1.1604 | 0.4677 | 1    | 11.4181 | 5.6271 |
| RMPLS  | 6     | 1.7432 | 0.3832 | 4       | 0.4304 | 0.1341 | 3        | 0.6431 | 0.2322 | 2    | 5.382   | 3.1963 |
| RWPLS  | 1     | 5.8498 | 0.8737 | 1       | 1.8183 | 0.5998 | 1        | 5.4362 | 0.8935 | 1    | 9.819   | 4.0548 |
| RRWPLS | 1     | 5.7512 | 0.7406 | 1       | 1.9268 | 0.3576 | 1        | 4.6471 | 1.8023 | 2    | 7.1552  | 2.7309 |
| MIPLS  | 3     | 3.0681 | 0.4645 | 2       | 0.6744 | 0.2211 | 2        | 1.8753 | 0.951  | 2    | 9.7551  | 4.9673 |
| RMIPLS | 4     | 1.948  | 0.3188 | 4       | 0.5926 | 0.2111 | 1        | 1.067  | 0.3488 | 1    | 7.7745  | 4.783  |
| CPCR   | 8     | 4.8893 | 0.7858 | 4       | 1.1819 | 0.3124 | 3        | 3.2976 | 1.0151 | 1    | 9.5548  | 4.3041 |
| SPCR   | 1     | 5.7712 | 0.8979 | 1       | 2.216  | 0.8825 | 1        | 6.4154 | 2.0608 | 1    | 25.7079 | 9.6766 |
| UNIV   | 8     | 4.439  | 0.6844 | 4       | 0.7557 | 0.2846 | 7        | 2.8248 | 1.0951 | 5    | 23.4102 | 8.7362 |
